# Supplementary material for: Sequestration of steroidal estrogen in aqueous samples using an adsorption mechanism: a systemic scientometric review
Source: Royal Society of Chemistry journal article supplement (doi:10.1039/d3ra02296j), 2023-01-01
Supplement: d3ra02296j1.pdf [file d3ra02296j1.pdf]

# **The Sequestration of Steroidal Estrogen in Aqueous Samples by Adsorption Mechanism: A Systemic Scientometric Review**

‡Ajibola A. Bayode<sup>1</sup>, Chijioke Olisah<sup>2</sup>, Stephen Sunday  
Emmanuel<sup>3</sup>, Morenike Oluwabunmi Adesina<sup>4</sup>, Koko Daniel  
Terlanga<sup>1</sup>

<sup>1</sup>Department of Chemical Sciences, Faculty of Natural Sciences,

Redeemer's University, P.M.B. 230, 232101, Ede, Nigeria

<sup>2</sup> Institute for Coastal and Marine Research, Nelson Mandela University, P.O Box

77000, Gqeberha 6031, South Africa

<sup>3</sup>Department of Industrial Chemistry, Faculty of Physical Sciences,

University of Ilorin, P.M.B. 1515, Ilorin, Nigeria

<sup>4</sup>Department of Chemistry, Faculty of Natural and Applied Sciences, Lead City

University, Nigeria

## SUPPLEMENTARY INFORMATION

**Table S1:** Summarized bibliographic data.

|                                         |            |
|-----------------------------------------|------------|
| <b>General bibliometric information</b> |            |
| Timespan                                | 1973: 2022 |
| Sources (Journals, Books, Documents)    | 75         |
| Average years from publication          | 5.51       |
| Average citations per document          | 28.72      |
| Average citations per year per doc      | 3.691      |
| References                              | 5695       |
| <b>Document Types</b>                   |            |
| Article                                 | 131        |
| Book chapters                           | 2          |
| Review                                  | 4          |
| <b>Document Contents</b>                |            |
| Keywords plus (ID)                      | 1127       |
| Author's keywords (DE)                  | 417        |
| <b>Authors</b>                          |            |
| Authors                                 | 476        |
| Author appearances                      | 672        |
| Authors of single-authored documents    | 0          |
| Authors of multi-authored documents     | 476        |
| <b>Authors Collaboration</b>            |            |
| Single-authored publication             | 0          |
| Publication per Author                  | 0.288      |
| Authors per publication                 | 3.47       |
| Co-Authors per publication              | 4.91       |
| Collaboration index                     | 3.47       |

**Table S2:** Most productive countries on studies involving the removal of SEs from a contaminated environment.

| Most productive countries |           |          |          |      |     |     |             | Total number of citations per country |                |                   |                  |
|---------------------------|-----------|----------|----------|------|-----|-----|-------------|---------------------------------------|----------------|-------------------|------------------|
| Rank                      | Countries | Articles | % Of 137 | Freq | SCA | MCA | MCA/A Ratio | Rank                                  | Country        | Article citations | Citation average |
| 1                         | China     | 47       | 34.31    | 0.35 | 44  | 3   | 0.06        | 1                                     | China          | 1172              | 24.94            |
| 2                         | Brazil    | 17       | 12.41    | 0.13 | 15  | 2   | 0.12        | 2                                     | USA            | 442               | 73.67            |
| 3                         | Iran      | 11       | 8.03     | 0.08 | 11  | 0   | 0.00        | 3                                     | Spain          | 357               | 357.00           |
| 4                         | India     | 8        | 5.84     | 0.06 | 7   | 1   | 0.13        | 4                                     | India          | 342               | 42.75            |
| 5                         | USA       | 6        | 4.38     | 0.04 | 4   | 2   | 0.33        | 5                                     | United Kingdom | 325               | 162.50           |

|    |                |   |      |      |   |   |      |    |                |     |        |
|----|----------------|---|------|------|---|---|------|----|----------------|-----|--------|
| 6  | Czech Republic | 5 | 3.65 | 0.04 | 4 | 1 | 0.20 | 6  | Brazil         | 204 | 12.00  |
| 7  | Malaysia       | 4 | 2.92 | 0.03 | 1 | 3 | 0.75 | 7  | Japan          | 177 | 177.00 |
| 8  | Austria        | 3 | 2.19 | 0.02 | 2 | 1 | 0.33 | 8  | France         | 128 | 42.67  |
| 9  | France         | 3 | 2.19 | 0.02 | 1 | 2 | 0.67 | 9  | Singapore      | 103 | 51.50  |
| 10 | Italy          | 3 | 2.19 | 0.02 | 3 | 0 | 0.00 | 10 | New Zealand    | 100 | 50.00  |
| 11 | Serbia         | 3 | 2.19 | 0.02 | 3 | 0 | 0.00 | 11 | Iran           | 87  | 7.91   |
| 12 | South Africa   | 3 | 2.19 | 0.02 | 2 | 1 | 0.33 | 12 | Malaysia       | 70  | 17.50  |
| 13 | Turkey         | 3 | 2.19 | 0.02 | 3 | 0 | 0.00 | 13 | Austria        | 63  | 21.00  |
| 14 | New Zealand    | 2 | 1.46 | 0.01 | 1 | 1 | 0.50 | 14 | Italy          | 44  | 14.67  |
| 15 | Singapore      | 2 | 1.46 | 0.01 | 1 | 1 | 0.50 | 15 | Sweden         | 42  | 21.00  |
| 16 | Sweden         | 2 | 1.46 | 0.01 | 2 | 0 | 0.00 | 16 | Korea          | 24  | 24.00  |
| 17 | United Kingdom | 2 | 1.46 | 0.01 | 2 | 0 | 0.00 | 17 | Czech Republic | 22  | 4.40   |
| 18 | Egypt          | 1 | 0.73 | 0.01 | 1 | 0 | 0.00 | 18 | South Africa   | 21  | 7.00   |
| 19 | Ethiopia       | 1 | 0.73 | 0.01 | 0 | 1 | 1.00 | 19 | Greece         | 20  | 20.00  |
| 20 | Finland        | 1 | 0.73 | 0.01 | 1 | 0 | 0.00 | 20 | Serbia         | 15  | 5.00   |

SCA – Single country article; MCP – multiple country article

**Table S3.** The ten most cited articles on SEs removal research were retrieved from the Scopus and WoS databases.

| Rank | First Author Names, Initials and Publication Year | Article Title                                                                                                                                                                        | Journal             | TC  | TC/Y  |
|------|---------------------------------------------------|--------------------------------------------------------------------------------------------------------------------------------------------------------------------------------------|---------------------|-----|-------|
| 1    | Pan B, 2008                                       | “Adsorption and hysteresis of bisphenol A and 17 $\alpha$ -ethinyl estradiol on carbon nanomaterials”                                                                                | Environ Sci Technol | 366 | 24.4  |
| 2    | Zhang Y, 2005                                     | “Removal of estrone and 17 $\beta$ -estradiol from water by adsorption”                                                                                                              | Water Res           | 172 | 9.56  |
| 3    | Chen CY, 2007                                     | “Determining estrogenic steroids in Taipei waters and removal in drinking water treatment using high-flow solid-phase extraction and liquid chromatography/tandem mass spectrometry” | Sci Total Environ   | 151 | 9.44  |
| 4    | Ali I, 2017                                       | “Supra molecular mechanism of the removal of 17- $\beta$ -estradiol endocrine                                                                                                        | J Mol Liq           | 137 | 22.83 |

|    |                 |                                                                                                                                                                                                                                                     |                     |     |       |
|----|-----------------|-----------------------------------------------------------------------------------------------------------------------------------------------------------------------------------------------------------------------------------------------------|---------------------|-----|-------|
| 5  | Jiang L, 2017   | disturbing pollutant from water on functionalized iron nano particles”<br>“Adsorption of estrogen contaminants by graphene nanomaterials under natural organic matter preloading: comparison to the carbon nanotube, biochar, and activated carbon” | Environ Sci Technol | 119 | 19.83 |
| 6  | Rovani S, 2014  | “Development of a new adsorbent from agro-industrial waste and its potential use in endocrine disruptor compound removal”                                                                                                                           | J Hazard Mater      | 83  | 9.22  |
| 7  | Zhongbo Z, 2008 | “Selective removal of estrogenic compounds by molecularly imprinted polymer (MIP)”                                                                                                                                                                  | Water Res           | 72  | 4.8   |
| 8  | Han J, 2013     | “Adsorption of ethinylestradiol (EE2) on polyamide 612: Molecular modelling and effects of water chemistry”                                                                                                                                         | Water Res           | 65  | 6.5   |
| 9  | Tang P, 2019    | “A simple and green method to construct cyclodextrin polymer for the effective and simultaneous estrogen pollutant and metal removal”                                                                                                               | Chem Eng J          | 57  | 14.25 |
| 10 | Tang P, 2018    | “Rapid and efficient removal of estrogenic pollutants from water by using beta-and gamma-cyclodextrin polymers”                                                                                                                                     | Chem Eng J          | 49  | 9.8   |

---
